# Supplementary material
Source: PubMed Central journal article supplement (PMC7850172)
Supplement: supp_8.2.E448_2019-0193-2-at.pdf [file supp_8.2.E448_2019-0193-2-at.pdf]

**Appendix 2 (as supplied by the authors): Structured chart abstraction tool (codebook)<sup>1</sup>**

| <b>GOALS AND VALUES</b><br><i>7 total items</i><br><i>For scoring purposes – Goals of care can be EITHER specific OR non-specific</i> |                                                                                                                                                                                                                               |                                                                                                                                                                                                                                     |
|---------------------------------------------------------------------------------------------------------------------------------------|-------------------------------------------------------------------------------------------------------------------------------------------------------------------------------------------------------------------------------|-------------------------------------------------------------------------------------------------------------------------------------------------------------------------------------------------------------------------------------|
| Goals of care (unspecified)                                                                                                           | Documentation of a discussion about “goals” or “goals of care”, without mention of specific goals or priorities.<br><br>If any one or more of the following subdomains were addressed, a point was also given in this domain. | Examples: “We also discussed goals of care”; “30 minutes were spent discussing goals of care”                                                                                                                                       |
| Goals, priorities, “is important to” (specific)                                                                                       | Documentation of a discussion about particular goals important to the patient, excluding “treatment decisions” (e.g. decisions about chemotherapy regimens).                                                                  | Examples: “The patient wants to be at home/live as long as possible/not be a burden”; “His priority is to be able to teach his courses this fall” ; “It is important to her to be able to enjoy their trip to Hawaii in the spring” |
| Fears, worries                                                                                                                        | Documentation of a patient’s fears, worries or concerns                                                                                                                                                                       | Example: “He worries about becoming dependent and ‘dying without dignity”                                                                                                                                                           |
| Tradeoffs                                                                                                                             | Documentation of what a patient is willing to go through (e.g. for the possibility of more time)                                                                                                                              | Example: “He does not want to experience any major side effects unless there is a high likelihood of therapeutic benefit”                                                                                                           |
| Function, abilities                                                                                                                   | Documentation of abilities that are critical to the patient                                                                                                                                                                   | Example: “Maintaining his ability to interact with others is important to him”                                                                                                                                                      |

|                                                                                                                                                               |                                                                                                                                                                                                                                                                                                                                                                                                               |                                                                                                                                                                                                                                                                                       |
|---------------------------------------------------------------------------------------------------------------------------------------------------------------|---------------------------------------------------------------------------------------------------------------------------------------------------------------------------------------------------------------------------------------------------------------------------------------------------------------------------------------------------------------------------------------------------------------|---------------------------------------------------------------------------------------------------------------------------------------------------------------------------------------------------------------------------------------------------------------------------------------|
| Quality of life                                                                                                                                               | Explicit documentation of a discussion about the patient's quality of life or how the patient subjectively defines quality of life.                                                                                                                                                                                                                                                                           | Example: "We had a long discussion re: quality of life today"<br>References to symptom control on the ward do not qualify as a point for QOL. Example: "Patient given hydromorphone for pain"                                                                                         |
| Family involvement/Support for Family                                                                                                                         | Documentation of how much family knows about the patient's priorities/wishes; how much the patient wants family to be involved in further decisions; planning for family to be present at subsequent discussions; the role of the family in the patient's care or how the family is affected by the patient's illness.<br><br>A mention that family was present for the conversation do not count as a point. | Examples: "We talked about how he and his wife might begin to have conversations with their daughters." ; "We talked about how her son has been helping her manage at home." "We talked about how she feels she is a burden on her son and how he needs more support as a caregiver." |
| <p><b>PROGNOSIS OR PROGNOSTIC UNDERSTANDING</b><br/> <i>4 total items</i><br/> <i>For scoring purposes – Prognosis is EITHER specific OR non-specific</i></p> |                                                                                                                                                                                                                                                                                                                                                                                                               |                                                                                                                                                                                                                                                                                       |
| Information preferences                                                                                                                                       | Documentation of the patient's preferences to receive information about prognosis or the future.                                                                                                                                                                                                                                                                                                              | Example: "Patient stated she would like to receive prognostic information frequently and in the presence of family"                                                                                                                                                                   |
| Prognostic understanding                                                                                                                                      | Documentation of the patient's understanding of illness or prognosis                                                                                                                                                                                                                                                                                                                                          | Example: "We talked about his cancer today, and he understands that his tumor is incurable"; "He knows he only has weeks to live"                                                                                                                                                     |

|                                                                                                                                                                      |                                                                                                                                                                                                                                                                                                          |                                                                                                                                                                                                                     |
|----------------------------------------------------------------------------------------------------------------------------------------------------------------------|----------------------------------------------------------------------------------------------------------------------------------------------------------------------------------------------------------------------------------------------------------------------------------------------------------|---------------------------------------------------------------------------------------------------------------------------------------------------------------------------------------------------------------------|
| <p>Prognosis/life expectancy (unspecified)</p>                                                                                                                       | <p>Documentation of a discussion about prognosis or life expectancy, without specific communication of time, function, or QOL.</p> <p>If the following subdomain was addressed, a point was also given in this domain.</p>                                                                               | <p>Example: “We discussed his prognosis today”; “30 minutes were spent today answering their questions about prognosis and treatment options”</p>                                                                   |
| <p>Prognostic communication about time, function, or QOL; no more treatment options, progression of disease, worsening of disease, functional decline (specific)</p> | <p>Documentation of specific mentions of prognosis (in terms of time, function, or QOL) or discussion of no more treatment options, progression of disease, worsening of disease, functional decline</p>                                                                                                 | <p>Example: “They had questions about prognosis. I shared that he likely has weeks to months left.” ; “We discussed this is likely the best the patient will feel and the disease will cause worsening decline”</p> |
| <p><b>END-OF-LIFE CARE PLANNING</b><br/> <i>4 total items</i></p>                                                                                                    |                                                                                                                                                                                                                                                                                                          |                                                                                                                                                                                                                     |
| <p>End of life, end of life planning, EOL, advance care planning (unspecified)</p>                                                                                   | <p>Documentation of any of these keywords in the context of a broader discussion.</p> <p>If any one or more of the following subdomains were addressed, a point was also given in this domain.</p>                                                                                                       | <p>Example: “Today we discussed the patient’s end-of-life preferences.”</p>                                                                                                                                         |
| <p>Palliative care, supportive care, comfort-focused care</p>                                                                                                        | <p>Documentation of discussion about future use of, initiating or transitioning to palliative care, supportive care, or comfort-focused care (not including palliative chemotherapy).</p> <p>Report of use of palliative approach to care alone did not count without documentation of a discussion.</p> | <p>Example: “She and her family indicated that given the circumstances, they would like to start a comfort-oriented approach.”</p>                                                                                  |

|                                                                                            |                                                                                                                                                                                         |                                                                                                                           |
|--------------------------------------------------------------------------------------------|-----------------------------------------------------------------------------------------------------------------------------------------------------------------------------------------|---------------------------------------------------------------------------------------------------------------------------|
| Hospice                                                                                    | Documentation of any of these keywords in a discussion.                                                                                                                                 | Example: “After a lengthy discussion, we have opted to discontinue therapy and proceed with referral to hospice.”         |
| Site of death/Practical planning                                                           | Documentation of a discussion indicating where the patient wants to be at death (e.g. at home, or at hospice) or about estate planning or legal documents.                              | Example: “Patient wishes to die at home”                                                                                  |
| <b>CODE STATUS OR LIFE-SUSTAINING TREATMENTS</b><br><i>2 total items</i>                   |                                                                                                                                                                                         |                                                                                                                           |
| Code status (DNR/DNI/Full code)                                                            | Documentation of discussion with keywords “Code Status” “Full Code”, “CPR” or “DNR”.<br><br>Reports of code status alone do not count without documentation that a discussion occurred. | Example: “Today we discussed code status”<br>“Patient states she wishes to switch to Full Code given these circumstances” |
| Life-sustaining treatments (Also: chest compressions/ intubation/shocks/ feeding tube/ICU) | Discussion specifying life sustaining treatments that are within patients desired scope of care.                                                                                        | Examples: “We talked about whether the patient would want CPR if her heart stopped beating”                               |

**Reference**

1. Lakin JR, Koritsanszky LA, Cunningham R, et al. A systematic intervention to improve serious illness communication in primary care. *Health Aff (Millwood)* 2017;36:1258-64.
