# Supplementary material
Source: PubMed Central journal article supplement (PMC7850172)
Supplement: supp_8.2.E448_2019-0193-3-at.pdf [file supp_8.2.E448_2019-0193-3-at.pdf]

### Appendix 3 (as supplied by the authors): Supplemental tables

Supplemental Table S1: Quality of serious illness conversations based on chart review using a validated codebook

| Domain                                          | Intervention (n=55) | Control (n=28) | P-value |
|-------------------------------------------------|---------------------|----------------|---------|
| Life-sustaining treatments, total (/2)          | 2 (1,2)             | 1 (0,2)        | 0.03    |
| Prognosis and illness understanding, total (/4) | 3 (2,3)             | 1 (0,2)        | <0.001  |
| Values and goals, total (/7)                    | 4 (2,6)             | 1 (0,1)        | <0.001  |
| EOL care planning, total (/4)                   | 0.5 (0,2)           | 2 (0,2)        | 0.48    |
| Overall (/17)                                   | 9 (7,12)            | 4 (3,6)        | <0.001  |

All values reported as median (interquartile range) mean (SD)

Supplemental Table S2: Quality of Serious Illness Conversations: presence of individual codebook items

| Domain                              |                                         | Intervention<br>(n=55) | Control<br>(n=28) | P-value |
|-------------------------------------|-----------------------------------------|------------------------|-------------------|---------|
| Life-sustaining treatments          | Code status                             | 42 (76)                | 20 (71)           | 0.62    |
|                                     | Life-sustaining treatments, etc         | 37 (67)                | 9 (32)            | 0.002   |
| Prognosis and illness understanding | Illness understanding                   | 45 (82)                | 8 (29)            | <0.001  |
|                                     | Information preferences                 | 18 (33)                | 0 (0)             | 0.001   |
|                                     | Prognosis, unspecified                  | 47 (85)                | 19 (68)           | 0.06    |
|                                     | Prognosis communication about time, etc | 34 (62)                | 8 (29)            | 0.004   |
| Values and goals                    | Goals of care, unspecified              | 46 (84)                | 15 (54)           | 0.003   |
|                                     | Goals, priorities, "is important to"    | 38 (69)                | 2 (7)             | <0.001  |
|                                     | Fears, worries                          | 34 (62)                | 0 (0)             | <0.001  |
|                                     | Tradeoffs                               | 18 (33)                | 2 (7)             | 0.01    |
|                                     | Function, abilities                     | 20 (36)                | 0 (0)             | <0.001  |

|                           |                               |         |         |        |
|---------------------------|-------------------------------|---------|---------|--------|
|                           | Quality of life               | 26 (47) | 2 (7)   | <0.001 |
|                           | Family involvement, etc       | 17 (31) | 2 (7)   | 0.01   |
| End-of-life care planning | End-of-life, unspecified      | 27 (4)  | 18 (64) | 0.19   |
|                           | Palliative care, etc          | 22 (40) | 18 (64) | 0.04   |
|                           | Hospice                       | 2 (4)   | 0 (0)   | 0.55   |
|                           | Site of death discussion, etc | 7 (13)  | 0 (0)   | 0.09   |

All values reported as number (percent)
