# Supplementary material
Source: PubMed Central journal article supplement (PMC7850172)
Supplement: supp_8.2.E448_2019-0193-original-submission.pdf [file supp_8.2.E448_2019-0193-original-submission.pdf]

1  
2  
3 **Assessing quality of clinicians' conversations with patients and families during the Serious**  
4 **Illness Care Program Quality Improvement initiative**  
5

6 Christina Ma\*, BHSc

7 ·Michael G. DeGroot School of Medicine, Faculty of Health Sciences, McMaster University,  
8 Hamilton, Ontario, Canada.  
9

10 Lauren Riehm\*, BSc

11 ·Michael G. DeGroot School of Medicine, Faculty of Health Sciences, McMaster University,  
12 Hamilton, Ontario, Canada.  
13  
14

15 Rachelle Bernacki, MD, MS

16 ·Harvard Medical School, Boston, Massachusetts.

17 ·Department of Psychosocial Oncology and Palliative Care, Dana-Farber Cancer Institute, Boston,  
18 Massachusetts.

19 ·Ariadne Labs, Brigham and Women's Hospital & Harvard T. H. Chan School of Public Health,  
20 Boston, Massachusetts.

21 ·Department of Medicine, Brigham and Women's Hospital, Boston, Massachusetts.  
22

23 Joanna Paladino, MD

24 ·Harvard Medical School, Boston, Massachusetts.

25 ·Ariadne Labs, Brigham and Women's Hospital & Harvard T. H. Chan School of Public Health,  
26 Boston, Massachusetts.

27 ·Department of Medicine, Brigham and Women's Hospital, Boston, Massachusetts.  
28

29 John J. You, MD MSc

30 ·Division of General Internal and Hospitalist Medicine, Trillium Health Partners, Mississauga, Ontario,  
31 Canada.

32 ·Departments of Medicine, and Health Research Methods, Evidence, and Impact, McMaster  
33 University, Hamilton, Ontario, Canada.  
34

35 \*Both authors contributed equally to this work  
36

37 Word count (excluding title page, abstract, references): x,xxx  
38

39 Address correspondence to: Dr. John You, 2200 Eglinton Ave W, Mississauga, ON L5M 2N1,  
40 Canada, tel: +1-905-813-2200; fax: +1-905-804-7975; email: John.You@thp.ca  
41  
42  
43  
44  
45  
46  
47  
48  
49  
50  
51  
52  
53  
54  
55  
56  
57  
58  
59  
60

## Abstract

### Background

Seriously ill hospitalized patients have indicated that better communication with practitioners is vital for improving care. The aim of this study was to assess whether the quality of serious illness conversations improved after implementation of the Serious Illness Care Program (SICP).

### Methods

This retrospective chart review evaluated patients who were admitted to a medical ward at Hamilton General Hospital for at least 48 hours and were at risk of prolonged hospital admission or increased need for community-based services (interRAI Emergency Department Screener score 5 or 6; possible score 1 to 6). We used a validated codebook to assess the quality of documented serious illness conversations for eligible patients before and after SICP implementation, specifically examining the following domains: patients' values and goals, prognosis and illness understanding, end-of-life care planning, and code status.

### Results

The study sample included 56 control patients from a time period before SICP implementation and 56 patients from the SICP implementation period. The overall quality of documented serious illness conversations of intervention patients was significantly higher ( $p < 0.001$ ) compared to those in the control group and was significantly higher in the sub-domains of values and goals ( $p < 0.001$ ), prognosis and illness understanding ( $p < 0.001$ ), and life-sustaining treatments ( $p = 0.04$ ), but not end-of-life care planning ( $p = 0.36$ ).

### Interpretation

Implementation of the SICP in a hospital setting was associated with a higher quality of documented serious illness conversations with patients at high risk of clinical or functional deterioration.

## Introduction

Current communication practices often do not meet the needs of seriously ill hospitalized patients. For example, there is a lack of honest discussion surrounding prognosis with patients who have serious illness, especially those with non-cancer diagnoses [1, 2]. However, patients have identified that having these discussions is necessary to prepare for what lies ahead and a shared understanding of illness trajectory is important to support high quality care [2]. In addition to prognosis, seriously ill hospitalized patients have expressed that an exploration of values, fears and preferences is important to them; however, these elements are infrequently discussed by clinicians in the hospital setting [2, 3]. As a result of these gaps in communication, patients often receive invasive treatments that are discordant with their values and goals [3-5]. Inadequate communication during serious illness between practitioners, patients, or their families has a negative impact on satisfaction with care and can also create distress for surrogate decision makers in making proxy decisions about treatment [6]. Evidence suggests that improved communication earlier in the illness trajectory with patients and future surrogate decision makers about the patient's values, goals and priorities can substantially ameliorate some of this emotional burden [6].

In this paper, we define a serious illness conversation as any conversation between a practitioner and a patient with serious life-limiting illness, or their surrogate decision maker(s), about illness understanding, prognosis, values, fears, and sources of strength, with the intent to inform current or future decisions about treatment. We recently adapted and implemented the Serious Illness Care Program (SICP) on the medical wards of our hospital to build capacity to have more frequent and higher quality serious illness conversations [7, 8]. The rationale for this program is that scalable solutions are needed to equip non-palliative care clinicians with communication skills that can enable them to initiate a palliative approach to care earlier in the trajectory of serious, life-limiting illness without necessarily needing to formally involve palliative care practitioners. The SICP was originally designed for outpatient oncology practice and has been successfully implemented in primary care [9]. However, we judged that it addressed a number of well-documented gaps in communication with hospitalized patients who have serious illness [3, 4]. Therefore, we conducted a quality improvement initiative to adapt the SICP for an inpatient setting and to implement the program on the medical wards of our hospital. In this study, we used a validated, structured codebook to compare the quality of documented serious illness conversations for hospitalized patients at high risk of clinical or functional deterioration who were enrolled in the SICP compared to a similar group of historical control patients who were not enrolled.

## Methods

### *Design*

We conducted a retrospective chart audit to assess the quality of serious illness conversations during implementation of the SICP quality improvement initiative compared to usual care (see Control Group below).

### *Setting*

The quality improvement initiative was conducted on the general internal medicine wards at Hamilton General Hospital (HGH), a teaching hospital affiliated with McMaster University, Hamilton, Ontario, Canada. Ethics approval was obtained for coding of SICP conversations by the Hamilton Integrated Research Ethics Board. Implementation of the SICP itself did not require ethics approval, as it is a quality improvement initiative.

### *Intervention*

The SICP is a health system intervention aimed at building capacity for clinicians to have more frequent, earlier, and more person-centered conversations with patients who have serious illness [7,8,10]. The SICP includes tools for clinicians, an educational component and a system change

1  
2  
3 component. Please refer to Online Appendix 1 for a detailed description of the SICP and how it was  
4 adapted to the inpatient medical setting.  
5

### 6 *Intervention Group*

7 Patients were eligible to be enrolled in the SICP if they were i) admitted to a medical ward at HGH  
8 for at least 48 hours and ii) received an interRAI Emergency Department Screener score of 5 or 6  
9 (possible scores ranged from 1 to 6) when assessed by a trained nurse at the time of hospital  
10 admission. During the implementation of the SICP, between March 1, 2017 and January 19, 2018,  
11 we screened 391 patients for eligibility, identified 275 eligible patients, and delivered serious illness  
12 conversations to a convenience sample of 56 eligible patients using the Guide. Conversations could  
13 not be delivered to all eligible patients because of practical limitations on the maximum number of  
14 serious illness conversations a given clinician could hold during a typical work week and because  
15 some patients were discharged from hospital before a conversation could be arranged.  
16

### 17 *Control group*

18 Before implementation of the SICP quality improvement initiative on March 1, 2017, we had  
19 prospectively conducted 2 cross-sectional sampling exercises. These collected data on basic  
20 demographic characteristics (age, sex), comorbidities (using the Charlson Comorbidity Index [14]),  
21 and scores on the InterRAI Emergency Department Screening Tool at time of admission for all  
22 medical inpatients at HGH on a single day in December 2016 and on a single day in February 2017,  
23 respectively. To enable comparison of the quality of serious illness conversations during  
24 implementation of the SICP and usual care, we created a control group (i.e., unexposed to the SICP)  
25 consisting of any patients from these 2 cross-sectional samples who had a length of stay of at least  
26 48 hours and had an admission score of 5 or 6 on the InterRAI Emergency Department Screening  
27 Tool.  
28

### 29 *Evaluating quality of conversations*

30 Assessors (C.M., L.R., J.Y.) independently abstracted data from the medical records of the  
31 intervention and control patient groups using a structured data collection form and validated  
32 codebook from Lakin et al. (2017) that was developed to rate the quality of serious illness  
33 conversations. At the beginning of the study, all assessors participated in a calibration exercise to  
34 enhance interrater reliability of chart abstraction. Each assessor independently abstracted data from  
35 6 randomly selected charts (3 from intervention group and 3 from control group) and compared their  
36 results to reach consensus on scores for these 6 subjects and to ensure consistency.  
37

38 After the calibration exercise, assessors (C.M and L.R.) each independently evaluated one half of  
39 the control and intervention group charts. To maintain consistency, every 10th chart was coded in  
40 duplicate by the second reviewer and the results of the two reviewers were compared at regular  
41 intervals.  
42

43  
44 When assessing the quality of documented serious illness conversations, dictated and written  
45 progress notes from patient charts were eligible to be coded. There was a significant amount of  
46 heterogeneity in how serious illness conversations were documented in control charts. In order to  
47 capture all potential serious illness conversations in the control group, we used a low threshold to  
48 include notes as serious illness conversations. Therefore, conversations were considered "Serious  
49 Illness Conversations" if they scored one point or greater using the codebook. Furthermore, many  
50 control charts had multiple documented conversations that scored one point or greater. In these  
51 cases, we used the conversation that scored the greatest amount of points in the analysis. Control  
52 charts without documented serious illness conversation were excluded from the analysis.  
53

54 The following domains were used to evaluate the quality of goals of care conversations: patient  
55 values and goals (assessed on a scale of 0-7), prognosis/illness understanding (assessed on a  
56  
57  
58  
59  
60

1  
2  
3 scale of 0-4), end of life care planning (assessed on a scale of 0-4), code status or desire for other  
4 life sustaining procedures (assessed on a scale of 0-2). The total possible score is 0-17. See Online  
5 Appendix 1 for a more detailed document on scoring for codebook domains.  
6

### 7 *Statistical analysis*

8 We used descriptive statistics to summarize the distributions of age, sex, and Charlson Comorbidity  
9 Index for intervention and control patients and compared those distributions using an unpaired t-test  
10 for continuous variables (age, Charlson Comorbidity Index) and a chi squared test for categorical  
11 variables (sex). The significance level was set at  $p < 0.05$ . We hypothesized that the quality of serious  
12 illness conversations would be higher in the intervention patients than in the control patients. We  
13 used unpaired t-tests to compare the difference in codebook scores of the intervention and control  
14 groups.  
15

## 16 **Results**

### 17 *Serious Illness Conversations*

18 *Table 1* displays the characteristics of the intervention and control subjects. There were no  
19 significant differences in their age or sex distribution. Of the 56 patients in the intervention group, 55  
20 (98%) had a serious illness conversation documented in the medical record, and 39 (70%) of these  
21 conversations were documented as dictated, transcribed notes in the electronic medical record, with  
22 the remaining 16 (30%) documented as written progress notes in the paper chart. Of the 56 patients  
23 in the control group, 28 (50%) had a serious illness conversation documented in the medical record  
24 and, of these, 5 (18%) were dictated and transcribed in the electronic medical record, with the  
25 remaining 23 (82%) being documented as written progress notes. Serious illness conversations  
26 were more likely to be led by attending physicians (as compared to residents or nurse practitioners)  
27 in the intervention group than the control group (*Table 1*;  $p < 0.001$ ).  
28  
29

### 30 *Quality of Serious Illness Conversations*

31 *Table 2* presents the mean scores for the overall quality of serious illness conversations based on  
32 structured chart review using the validated codebook. This analysis only includes the patients in  
33 each group who had a documented serious illness conversation (intervention=55, control=28).  
34 Overall scores were significantly higher ( $p < 0.05$ ) in the intervention group compared to the control  
35 group (*Table 2, Figure 1*). Domain scores were also significantly higher in the intervention group  
36 compared to the control group except for the end-of-life care planning domain. Furthermore, mean  
37 scores were significantly higher in the intervention group than in the control group for nearly all  
38 codebook items within each domain (*Online appendix 2*).  
39  
40

41 We also conducted a sensitivity analysis to compare the quality of documented serious illness  
42 conversations in the intervention and control groups, stratified by conversations that were led by  
43 attending physicians versus conversations that were led by other clinicians (residents or nurse  
44 practitioners). Within both strata, we found that the quality of conversations was higher in the  
45 intervention group than in the control group (*Table 3*).  
46

## 47 **Interpretation**

48 Health care practitioners need to have higher quality serious illness conversations with hospitalized  
49 patients [3, 15-19]. Currently, serious illness conversations that take place between inpatients and  
50 their health care practitioners do not meet patient needs, nor do they prepare them for what lies  
51 ahead, resulting in the use of invasive treatments that do not align with patients' values and goals [2-  
52 5]. In this single center, retrospective chart review study, we found that the quality of documented  
53 serious illness conversations after implementation of the SICP, assessed using a validated  
54 codebook, was significantly higher across multiple domains compared to usual care. In particular,  
55 conversations after SICP implementation more often discussed patients' values and goals,  
56  
57  
58  
59  
60

1  
2  
3 prognosis and illness understanding compared to usual care. To our knowledge, this study is the first  
4 to assess whether the SICP improves the quality of serious illness conversations after  
5 implementation in the inpatient medical setting. Our study expands on the existing body of work that  
6 has studied the use of the SICP in other clinical settings. For example, Lakin et al. conducted a  
7 similar analysis after implementation of the SICP in the primary care setting which demonstrated an  
8 increased number of serious illness conversations and improved accessibility and  
9 comprehensiveness of serious illness conversations [20]. Our findings are consistent with those of  
10 Lakin et al. and suggest that the SICP is a flexible model that can be adapted successfully to both  
11 the inpatient and outpatient settings as well as oncology and non-oncology populations.  
12

13 We also found that serious illness conversations were more clearly documented and more  
14 retrievable after SICP implementation. 70% of the serious illness conversations in the intervention  
15 group were documented as well-labeled, dictated notes in patients' electronic medical records  
16 specific only to the serious illness conversation. In comparison, only 18% of the conversations in the  
17 control group were dictated and transcribed in the electronic medical record, and all of these  
18 transcribed notes contained additional information that was not directly pertinent to the serious  
19 illness conversation. The remaining 82% of the serious illness conversations in the control group  
20 were documented as hand-written progress notes. A recent multicentre study demonstrated that  
21 patients on internal medicine wards are at risk of inappropriate end-of-life care which is in part  
22 related to poor communication and poor documentation of serious illness conversations [20]. The  
23 potential implications of improved accessibility and clarity of documentation as a result of SICP  
24 implementation are an increased likelihood that the content of these conversations can impact future  
25 care and reduced medical error related to interventions discordant with patient preferences.  
26

27 There was no significant difference between control and intervention conversations in the end-of-life  
28 planning domain, and the findings for the life-sustaining treatments domain were not as robust  
29 compared to the prognosis/illness understanding and values/goals domains. This is consistent with  
30 what was found in SICP implementation in oncology patients (with more robust improvements in the  
31 prognosis/illness understanding and values/goals domains) [21]. We hypothesize that serious illness  
32 conversations are more values-oriented when clinicians follow the Serious Illness Conversation  
33 Guide. An important focus of the clinician training component of the SICP is to re-orient clinicians to  
34 focus on eliciting values and goals during serious illness conversations, and to communicate  
35 prognostication with patients and their families, rather than procedure-focused conversations that  
36 are typical of current practice.  
37

38 Our study also has limitations. First, due to the nature of the intervention, researchers could not be  
39 blinded during data extraction. Coding of written and dictated notes summarizing serious illness  
40 conversations required subjective interpretation. However, in addition to using a structured  
41 evaluation tool, the study authors completed a calibration exercise and conducted regular internal  
42 audits of chart abstraction to minimize the subjectivity and maximize consistency in this  
43 process. Second, we did not deliver serious illness conversations to all eligible patients we identified  
44 during the intervention period. To the extent that missed patients were systematically different in  
45 ways that would have affected the quality of serious illness conversations, this introduces a risk of  
46 bias into our findings. Finally, our study findings are based on the implementation of SICP at a single  
47 academic teaching hospital. As a result, our results may not be transferable to other health care  
48 settings or to other jurisdictions.  
49

50  
51 In conclusion, in this single-centre retrospective chart review study, we found that the SICP, when  
52 implemented in a hospital setting, is associated with a higher quality of documented serious illness  
53 conversations compared to usual care. Our findings suggest that a structured approach to triggering,  
54 conducting and documenting serious illness conversations can enhance both the quality of the  
55 conversation itself as well as the retrievability of the documentation. Future work should continue to  
56  
57  
58  
59  
60



1  
2  
3 focus on identifying best practices to implement these structured approaches in clinical practice and  
4 to increase their uptake by clinicians.  
5  
6  
7  
8  
9  
10  
11  
12  
13  
14  
15  
16  
17  
18  
19  
20  
21  
22  
23  
24  
25  
26  
27  
28  
29  
30  
31  
32  
33  
34  
35  
36  
37  
38  
39  
40  
41  
42  
43  
44  
45  
46  
47  
48  
49  
50  
51  
52  
53  
54  
55  
56  
57  
58  
59  
60

Confidential

## References

1. Davison SN. End-of-life care preferences and needs: perceptions of patients with chronic kidney disease. *Clinical Journal of the American Society of Nephrology*. 2010 Feb 1;5(2):195-204.
2. Heyland DK, Allan DE, Rocker G, Dodek P, Pichora D, Gafni A, Canadian Researchers at the End-of-Life Network (CARENET). Discussing prognosis with patients and their families near the end of life: impact on satisfaction with end-of-life care. *Open Medicine*. 2009;3(2):e101.
3. You JJ, Dodek P, Lamontagne F, Downar J, Sinuff T, Jiang X, Day AG, Heyland DK. What really matters in end-of-life discussions? Perspectives of patients in hospital with serious illness and their families. *Cmaj*. 2014 Dec 9;186(18):E679-87.
4. Heyland DK, Barwich D, Pichora D, Dodek P, Lamontagne F, You JJ, Tayler C, Porterfield P, Sinuff T, Simon J, ACCEPT (Advance Care Planning Evaluation in Elderly Patients) Study Team. Failure to engage hospitalized elderly patients and their families in advance care planning. *JAMA internal medicine*. 2013 May 13;173(9):778-87.
5. Yung VY, Walling AM, Min L, Wenger NS, Ganz DA. Documentation of advance care planning for community-dwelling elders. *Journal of palliative medicine*. 2010 Jul 1;13(7):861-7.
6. Wendler D, Rid A. Systematic review: the effect on surrogates of making treatment decisions for others. *Annals of internal medicine*. 2011 Mar 1;154(5):336-46.
7. Bernacki R, Hutchings M, Vick J, Smith G, Paladino J, Lipsitz S, Gawande AA, Block SD. Development of the Serious Illness Care Program: a randomised controlled trial of a palliative care communication intervention. *BMJ open*. 2015 Oct 1;5(10):e009032.
8. Bernacki RE, Block SD. Communication about serious illness care goals: a review and synthesis of best practices. *JAMA internal medicine*. 2014 Dec 1;174(12):1994-2003.
9. Lakin JR, Koritsanszky LA, Cunningham R, Maloney FL, Neal BJ, Paladino J, Palmor MC, Vogeli C, Ferris TG, Block SD, Gawande AA. A systematic intervention to improve serious illness communication in primary care. *Health Affairs*. 2017 Jul 1;36(7):1258-64.
10. Bernacki R, Paladino J, Neville BA, Hutchings M, Kavanagh J, Geerse OP, Lakin J, Sanders JJ, Miller K, Lipsitz S, Gawande AA. Effect of the serious illness care program in outpatient oncology: a cluster randomized clinical trial. *JAMA internal medicine*. 2019 Jun 1;179(6):751-9.
11. Hirdes JP, Curtin-Telegdi N, Poss JW, Gray L, Berg KO, Stolee P. *Inter-RAI Contact Assessment: Screening Level Assessment for Emergency Department and Intake From Community/Hospital Assessment Form and User's Manual*. Rockport, MA: Open Book Systems. 2009.
12. Gray LC, Peel NM, Costa AP, Burkett E, Dey AB, Jonsson PV, Lakhan P, Ljunggren G, Sjostrand F, Swoboda W, Wellens NI. Profiles of older patients in the emergency department: findings from the interRAI Multinational Emergency Department Study. *Annals of emergency medicine*. 2013 Nov 1;62(5):467-74.
13. Costa AP, Hirdes JP, Heckman GA, Dey AB, Jonsson PV, Lakhan P, Ljunggren G, Singler K, Sjostrand F, Swoboda W, Wellens NI. Geriatric syndromes predict postdischarge outcomes among older emergency department patients: findings from the interRAI Multinational Emergency Department Study. *Academic Emergency Medicine*. 2014 Apr;21(4):422-33.
14. Charlson ME, Pompei P, Ales KL, MacKenzie CR. A new method of classifying prognostic comorbidity in longitudinal studies: development and validation. *Journal of chronic diseases*. 1987 Jan 1;40(5):373-83.
15. Stajduhar K, Sawatzky R, Cohen SR, Heyland DK, Allan D, Bidgood D, Norgrove L, Gadermann AM. Bereaved family members' perceptions of the quality of end-of-life care across four types of inpatient care settings. *BMC palliative care*. 2017 Dec;16(1):59.
16. Heyland DK, Cook DJ, Rocker GM, Dodek PM, Kutsogiannis DJ, Skrobik Y, Jiang X, Day AG, Cohen SR. Defining priorities for improving end-of-life care in Canada. *Cmaj*. 2010 Nov 9;182(16):E747-52.
17. You JJ, Downar J, Fowler RA, Lamontagne F, Ma IW, Jayaraman D, Kryworuchko J, Strachan PH, Ilan R, Nijjar AP, Neary J. Barriers to goals of care discussions with seriously ill



1  
2  
3 hospitalized patients and their families: a multicenter survey of clinicians. JAMA internal medicine.  
4 2015 Apr 1;175(4):549-56.

5 18. Apostol CC, Waldfogel JM, Pfoh ER, List D, Billing LS, Nesbit SA, Dy SM. Association of  
6 goals of care meetings for hospitalized cancer patients at risk for critical care with patient outcomes.  
7 Palliative medicine. 2015 Apr;29(4):386-90.

8 19. Hui D, Con A, Christie G, Hawley PH. Goals of care and end-of-life decision making for  
9 hospitalized patients at a Canadian tertiary care cancer center. Journal of pain and symptom  
10 management. 2009 Dec 1;38(6):871-81.

11 20. Heyland DK, Ilan R, Jiang X, You JJ, Dodek P. The prevalence of medical error related to  
12 end-of-life communication in Canadian hospitals: results of a multicentre observational study. BMJ  
13 Qual Saf. 2016 Sep 1;25(9):671-9.

14 21. Paladino J, Bernacki R, Neville BA, Kavanagh J, Miranda SP, Palmor M, Lakin J, Desai M,  
15 Lamas D, Sanders JJ, Gass J. Evaluating an intervention to improve communication between  
16 oncology clinicians and patients with life-limiting cancer: a cluster randomized clinical trial of the  
17 Serious Illness Care Program. JAMA oncology. 2019 Jun 1;5(6):801-9.  
18  
19  
20  
21  
22  
23  
24  
25  
26  
27  
28  
29  
30  
31  
32  
33  
34  
35  
36  
37  
38  
39  
40  
41  
42  
43  
44  
45  
46  
47  
48  
49  
50  
51  
52  
53  
54  
55  
56  
57  
58  
59  
60

Confidential

**Table 1.** Baseline characteristics of intervention and control patients and serious illness conversations

| Variable                                                | Intervention (n=56) | Control (n=56) | P value |
|---------------------------------------------------------|---------------------|----------------|---------|
| Age at time of conversation, years, mean (SD)           | 76.2 (11.8)         | 80.1 (11.4)    | 0.08    |
| Male, n (%)                                             | 26 (46)             | 25 (45)        | 0.84    |
| Charlson comorbidity index, mean (SD)                   | 0.9 (1.5)           | 1.1 (1.3)      | 0.89    |
| Serious illness conversation documented in chart, n (%) | 55 (98)             | 28 (50)        | <0.001  |
| Type of clinician who led conversation                  |                     |                |         |
| Attending physician, n (%)*                             | 48 (87)             | 12 (43)        | <0.001  |
| Resident, n (%)*                                        | 3 (5)               | 8 (29)         |         |
| Nurse practitioner, n (%)*                              | 4 (7)               | 8 (29)         |         |
| Family/proxy present, n (%)*                            | 48 (87)             | 24 (86)        | 0.84    |

\*Denominator is the number of patients with a documented serious illness conversation in the chart

**Table 2.** Quality of serious illness conversations based on chart review using a validated codebook

| Domain                                          | Intervention (n=55) | Control (n=28) | P-value |
|-------------------------------------------------|---------------------|----------------|---------|
| Life-sustaining treatments, total (/2)          | 1.4 (0.9)           | 1.0 (0.8)      | 0.04    |
| Prognosis and illness understanding, total (/4) | 2.6 (1.2)           | 1.3 (1.0)      | <0.001  |
| Values and goals, total (/7)                    | 3.6 (2.3)           | 0.8 (0.9)      | <0.001  |
| EOL care planning, total (/4)                   | 1.1 (1.1)           | 1.3 (1.0)      | 0.36    |
| Overall (/17)                                   | 8.7 (3.8)           | 4.4 (1.9)      | <0.001  |

All values reported as mean (SD)

1  
2  
3  
4  
5  
6  
7  
8  
9  
10  
11  
12  
13  
14  
15  
16  
17  
18  
19  
20  
21  
22  
23  
24  
25  
26  
27  
28  
29  
30  
31  
32  
33  
34  
35  
36  
37  
38  
39  
40  
41  
42  
43  
44  
45  
46  
47  
48  
49  
50  
51  
52  
53  
54  
55  
56  
57  
58  
59  
60

**Figure 1.** Quality of serious illness conversations

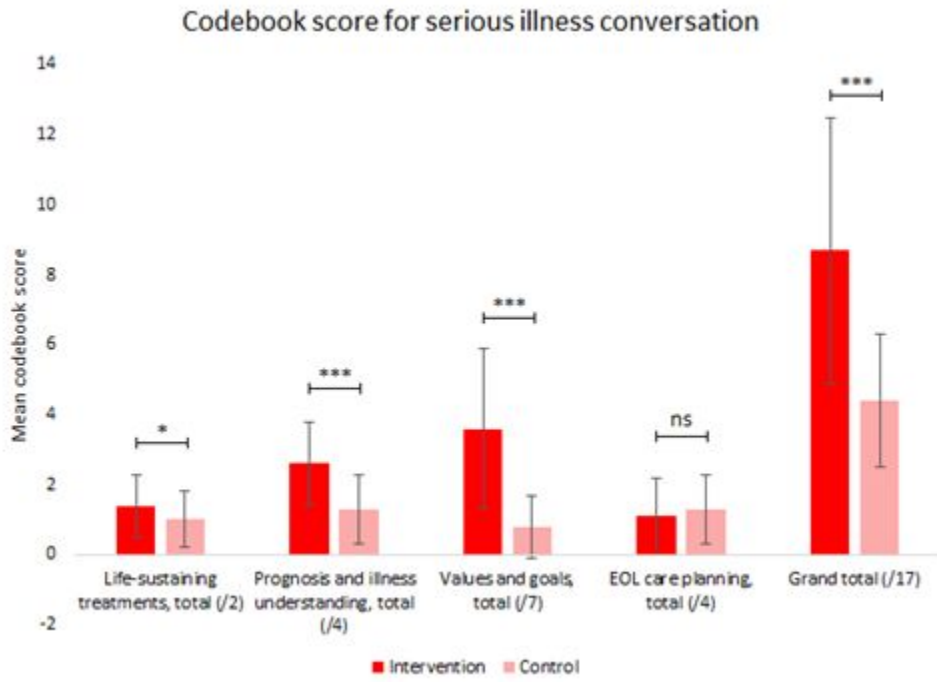

\* =  $p \leq 0.05$   
\*\* =  $p \leq 0.01$   
\*\*\* =  $p \leq 0.001$

**Table 3.** Quality of conversations between intervention and control conversations, stratified by the type of clinician leading the conversation

| Type of clinician who led conversation | Mean total codebook score (/17) |                | P-value |
|----------------------------------------|---------------------------------|----------------|---------|
|                                        | Intervention (n=55)             | Control (n=28) |         |
| Physician                              | 8.9 (3.9)                       | 4.6 (1.9)      | <0.001  |
| Resident or nurse practitioner         | 7.7 (2.6)                       | 4.3 (2.0)      | 0.002   |

All values reported as mean (SD)

Confidential

### Online Appendix 1. SICP and its adaptation to the inpatient setting

Tools include a Pre-Visit Letter for patients, the Serious Illness Conversation Guide and Clinician Reference Guide for clinicians, and a Family Communication Guide for patients and their families. The primary educational component consists of a 2.5 hour clinician training workshop. Components of the workshop include reflection, didactic teaching, skills practice using the Serious Illness Conversation Guide with standardized patients, and direct observation and feedback from faculty who have expertise in serious illness communication. System change refers to the design and implementation of the following processes to enable these conversations in practice: identifying suitable patients, triggering clinicians to have serious illness conversations with eligible patients, delivering the conversation using the Guide, and documenting the conversations in the medical record.

Although the clinician training component of the SICP did not require modifications, we made some adjustments to the original program to tailor processes for a hospital-based setting more generally, and for our local context more specifically. First, we leveraged an existing initiative at our hospital to systematically screen all patients age 65 years and older at the time of admission using a tool called the interRAI Emergency Department Screener [11]. This tool is a brief, validated, proprietary instrument with higher scores predicting an increased risk of prolonged hospitalization or need for community-based services. The instrument includes items in the domains of the patient's physical function, mood, comprehension, presence of dyspnea, and family/caregiver burnout at initial emergency assessment [11-13].

Second, to trigger clinicians (attending internists or nurse practitioners who participated in a 2.5 hour SICP clinician training workshop) to have a Serious Illness Conversation with eligible patients, we hired a Unit Champion to support our quality improvement initiative who was a former bedside nurse from one of our medical wards. The Unit Champion spoke with the attending internist or nurse practitioner most involved in the care of a given eligible patient to alert them that their patient would likely benefit from a Serious Illness Conversation. If vetted by the attending internist or nurse practitioner, the Unit Champion proceeded to prepare the patient and schedule a formal meeting. Third, to prepare eligible patients for the conversation, instead of mailing a Pre-Visit Letter, the Unit Champion met in person with patients or their family members (sometimes by telephone) to review content in the Pre-Visit Letter that was adapted for an inpatient context. Again, because we were working in a hospital setting, instead of a pre-booked clinic appointment, Serious Illness Conversations were scheduled to take place in a private meeting room on the ward (i.e., not at the patient's bedside). These conversations involved the patient and/or family member(s), the attending internist or nurse practitioner, and other interprofessional team members (e.g., social worker, physiotherapist, occupational therapist, etc) as judged relevant by the Unit Champion. Finally, conversations were documented by the attending internist, resident physician, or nurse practitioner as a structured, dictated clinical note with a separate heading corresponding to each item in the Serious Illness Conversation Guide. The note was subsequently transcribed, placed in the patient's electronic health record, and automatically faxed to the patient's primary care physician on record.



1  
2  
3 **Online Appendix 2**

4  
5 **The following was adapted from Paladino, Bernacki et al. [21]**

6  
7

| <p>8 <b>GOALS AND VALUES</b><br/>           9 <i>7 total items</i><br/>           10 <i>For scoring purposes – Goals of care can be EITHER specific OR non-specific</i></p> |                                                                                                                                                                                                                                                                                                                                                                                                                                    |
|-----------------------------------------------------------------------------------------------------------------------------------------------------------------------------|------------------------------------------------------------------------------------------------------------------------------------------------------------------------------------------------------------------------------------------------------------------------------------------------------------------------------------------------------------------------------------------------------------------------------------|
| <p>13 Goals of care (unspecified)</p>                                                                                                                                       | <p>14 Documentation of a discussion about “goals” or “goals of care”, without mention of specific goals or priorities.<br/>           15 Examples: “We also discussed goals of care”; “30 minutes were spent discussing goals of care”<br/>           16<br/>           17<br/>           18 If any one or more of the following subdomains were addressed, a point was also given in this domain.</p>                             |
| <p>22 Goals, priorities, “is important to” (specific)</p>                                                                                                                   | <p>23 Documentation of a discussion about particular goals important to the patient, excluding “treatment decisions” (e.g. decisions about chemotherapy regimens).<br/>           24 Examples: “The patient wants to be at home/live as long as possible/not be a burden”; “His priority is to be able to teach his courses this fall” ; “It is important to her to be able to enjoy their trip to Hawaii in the spring”</p>       |
| <p>31 Fears, worries</p>                                                                                                                                                    | <p>32 Documentation of a patient’s fears, worries or concerns<br/>           33 Example: “He worries about becoming dependent and ‘dying without dignity’”</p>                                                                                                                                                                                                                                                                     |
| <p>36 Tradeoffs</p>                                                                                                                                                         | <p>37 Documentation of what a patient is willing to go through (e.g. for the possibility of more time)<br/>           38 Example: “He does not want to experience any major side effects unless there is a high likelihood of therapeutic benefit”</p>                                                                                                                                                                             |
| <p>42 Function, abilities</p>                                                                                                                                               | <p>43 Documentation of abilities that are critical to the patient<br/>           44 Example: “Maintaining his ability to interact with others is important to him”</p>                                                                                                                                                                                                                                                             |
| <p>46 Quality of life</p>                                                                                                                                                   | <p>47 Explicit documentation of a discussion about the patient’s quality of life or how the patient subjectively defines quality of life.<br/>           48 Example: “We had a long discussion re: quality of life today”<br/>           49<br/>           50<br/>           51<br/>           52 References to symptom control on the ward do not qualify as a point for QOL. Example: “Patient given hydromorphone for pain”</p> |

53  
54  
55  
56  
57  
58  
59  
60

|                                                                                                                                                               |                                                                                                                                                                                                                                                                                                                                                                                                                                                                                                                                                                                                                                                                                                                                                                       |
|---------------------------------------------------------------------------------------------------------------------------------------------------------------|-----------------------------------------------------------------------------------------------------------------------------------------------------------------------------------------------------------------------------------------------------------------------------------------------------------------------------------------------------------------------------------------------------------------------------------------------------------------------------------------------------------------------------------------------------------------------------------------------------------------------------------------------------------------------------------------------------------------------------------------------------------------------|
| <p>Family involvement/Support for Family</p>                                                                                                                  | <p>Documentation of how much family knows about the patient's priorities/wishes; how much the patient wants family to be involved in further decisions; planning for family to be present at subsequent discussions; the role of the family in the patient's care or how the family is affected by the patient's illness.</p> <p>Examples: "We talked about how he and his wife might begin to have conversations with their daughters." ; "We talked about how her son has been helping her manage at home." "We talked about how she feels she is a burden on her son and how he needs more support as a caregiver."</p> <p>A mention that family was present for the conversation do not count as a point.<br/>Example: "Patient's sister present for meeting"</p> |
| <p><b>PROGNOSIS OR PROGNOSTIC UNDERSTANDING</b><br/> <i>4 total items</i><br/> <i>For scoring purposes – Prognosis is EITHER specific OR non-specific</i></p> |                                                                                                                                                                                                                                                                                                                                                                                                                                                                                                                                                                                                                                                                                                                                                                       |
| <p>Information preferences</p>                                                                                                                                | <p>Documentation of the patient's preferences to receive information about prognosis or the future.<br/>Example: "Patient stated she would like to receive prognostic information frequently and in the presence of family"</p>                                                                                                                                                                                                                                                                                                                                                                                                                                                                                                                                       |
| <p>Prognostic understanding</p>                                                                                                                               | <p>Documentation of the patient's understanding of illness or prognosis<br/>Example: "We talked about his cancer today, and he understands that his tumor is incurable"; "He knows he only has weeks to live"</p>                                                                                                                                                                                                                                                                                                                                                                                                                                                                                                                                                     |
| <p>Prognosis/life expectancy (unspecified)</p>                                                                                                                | <p>Documentation of a discussion about prognosis or life expectancy, without specific communication of time, function, or QOL.<br/>Example: "We discussed his prognosis today"; "30 minutes were spent today answering their questions about prognosis and treatment options"</p> <p>If the following subdomain was addressed, a point was also given in this domain.</p>                                                                                                                                                                                                                                                                                                                                                                                             |

|                                                                                                                                                                      |                                                                                                                                                                                                                                                                                                                                                                                                                                                                                                                         |
|----------------------------------------------------------------------------------------------------------------------------------------------------------------------|-------------------------------------------------------------------------------------------------------------------------------------------------------------------------------------------------------------------------------------------------------------------------------------------------------------------------------------------------------------------------------------------------------------------------------------------------------------------------------------------------------------------------|
| <p>Prognostic communication about time, function, or QOL; no more treatment options, progression of disease, worsening of disease, functional decline (specific)</p> | <p>Documentation of specific mentions of prognosis (in terms of time, function, or QOL) or discussion of no more treatment options, progression of disease, worsening of disease, functional decline</p> <p>Example: “They had questions about prognosis. I shared that he likely has weeks to months left.” ; “We discussed this is likely the best the patient will feel and the disease will cause worsening decline”</p>                                                                                            |
| <p><b>END-OF-LIFE CARE PLANNING</b><br/>4 total items</p>                                                                                                            |                                                                                                                                                                                                                                                                                                                                                                                                                                                                                                                         |
| <p>End of life, end of life planning, EOL, advance care planning (unspecified)</p>                                                                                   | <p>Documentation of any of these keywords in the context of a broader discussion. Example: “Today we discussed the patient’s end-of-life preferences.”</p> <p>If any one or more of the following subdomains were addressed, a point was also given in this domain.</p>                                                                                                                                                                                                                                                 |
| <p>Palliative care, supportive care, comfort-focused care</p>                                                                                                        | <p>Documentation of discussion about future use of, initiating or transitioning to palliative care, supportive care, or comfort-focused care (not including palliative chemotherapy).</p> <p>Example: “She and her family indicated that given the circumstances, they would like to start a comfort-oriented approach.”</p> <p>Report of use of palliative approach to care alone did not count without documentation of a discussion.</p> <p>Example: “Palliative care service following for symptoms management”</p> |
| <p>Hospice</p>                                                                                                                                                       | <p>Documentation of any of these keywords in a discussion. Example: “After a lengthy discussion, we have opted to discontinue therapy and proceed with referral to hospice.”</p>                                                                                                                                                                                                                                                                                                                                        |
| <p>Site of death/Practical planning</p>                                                                                                                              | <p>Documentation of a discussion indicating where the patient wants to be at death (e.g. at home, or at hospice) or about estate planning or legal documents.</p> <p>Example: “Patient wishes to die at home”</p>                                                                                                                                                                                                                                                                                                       |
| <p><b>CODE STATUS OR LIFE-SUSTAINING TREATMENTS</b><br/>2 total items</p>                                                                                            |                                                                                                                                                                                                                                                                                                                                                                                                                                                                                                                         |

1  
2  
3  
4  
5  
6  
7  
8  
9  
10  
11  
12  
13  
14  
15  
16  
17  
18  
19  
20  
21  
22  
23  
24  
25  
26  
27  
28  
29  
30  
31  
32  
33  
34  
35  
36  
37  
38  
39  
40  
41  
42  
43  
44  
45  
46  
47  
48  
49  
50  
51  
52  
53  
54  
55  
56  
57  
58  
59  
60

|                                                                                            |                                                                                                                                                                                                                                                                                                                                                     |
|--------------------------------------------------------------------------------------------|-----------------------------------------------------------------------------------------------------------------------------------------------------------------------------------------------------------------------------------------------------------------------------------------------------------------------------------------------------|
| Code status<br>(DNR/DNI/Full code)                                                         | Documentation of discussion with keywords “Code Status”<br>“Full Code”, “CPR” or “DNR”.<br>Example: “Today we discussed code status” “Patient states she wishes to switch to Full Code given these circumstances”<br><br>Reports of code status alone do not count without documentation that a discussion occurred.<br>Example: “Code Status: DNR” |
| Life-sustaining treatments (Also: chest compressions/ intubation/shocks/ feeding tube/ICU) | Discussion specifying life sustaining treatments that are within patients desired scope of care.<br>Examples: “We talked about whether the patient would want CPR if her heart stopped beating”                                                                                                                                                     |

Confidential

**Online Appendix 3.** Quality of Serious Illness Conversations: mean scores on individual codebook items

| Domain                              |                                              | Intervention<br>(n=55) | Control<br>(n=28) | P-<br>value |
|-------------------------------------|----------------------------------------------|------------------------|-------------------|-------------|
| Life-sustaining treatments          | Code status (/1)                             | 0.8 (0.4)              | 0.7 (0.5)         | 0.63        |
|                                     | Life-sustaining treatments, etc (/1)         | 0.7 (0.5)              | 0.3 (0.5)         | 0.002       |
| Prognosis and illness understanding | Illness understanding (/1)                   | 0.8 (0.4)              | 0.3 (0.5)         | <0.001      |
|                                     | Information preferences (/1)                 | 0.3 (0.5)              | 0 (0)             | <0.001      |
|                                     | Prognosis, unspecified (/1)                  | 0.9 (0.4)              | 0.7 (0.5)         | 0.06        |
|                                     | Prognosis communication about time, etc (/1) | 0.6 (0.5)              | 0.3 (0.5)         | 0.002       |
| Values and goals                    | Goals of care, unspecified (/1)              | 0.8 (0.4)              | 0.1 (0.3)         | 0.002       |
|                                     | Goals, priorities, "is important to" (/1)    | 0.7 (0.5)              | 0.1 (0.3)         | <0.001      |
|                                     | Fears, worries (/1)                          | 0.6 (0.5)              | 0 (0)             | <0.001      |
|                                     | Tradeoffs (/1)                               | 0.3 (0.5)              | 0.1 (0.3)         | 0.009       |
|                                     | Function, abilities (/1)                     | 0.4 (0.5)              | 0 (0)             | <0.001      |

1  
2  
3  
4  
5  
6  
7  
8  
9  
10  
11  
12  
13  
14  
15  
16  
17  
18  
19  
20  
21  
22  
23  
24  
25  
26  
27  
28  
29  
30  
31  
32  
33  
34  
35  
36  
37  
38  
39  
40  
41  
42  
43  
44  
45  
46  
47  
48  
49  
50  
51  
52  
53  
54  
55  
56  
57  
58  
59  
60

|                   |                                    |           |           |        |
|-------------------|------------------------------------|-----------|-----------|--------|
|                   | QOL (/1)                           | 0.5 (0.5) | 0.1 (0.3) | <0.001 |
|                   | Family involvement, etc (/1)       | 0.3 (0.5) | 0.1 (0.3) | 0.01   |
| EOL care planning | EOL, unspecified (/1)              | 0.5 (0.5) | 0.6 (0.5) | 0.19   |
|                   | Palliative care, etc (/1)          | 0.4 (0.5) | 0.6 (0.5) | 0.03   |
|                   | Hospice (/1)                       | 0 (0.29)  | 0 (0)     | 0.31   |
|                   | Site of death discussion, etc (/1) | 0.1 (0.3) | 0 (0)     | 0.05   |

All values reported as mean (SD)

Confidential
